# Supplementary material
Source: Research Square preprint supplement (doi:10.21203/rs.3.rs-8727112/v1)
Supplement: Supplementary file 1 [file 6e7c65584b2075e6e4b47983.docx]

**Appendix 1: Questionnaire given to trainees before and after workshop**

1. Year of training
   1. Year 1
   2. Year 2
   3. Year 3
   4. Year 4
   5. Year 5
2. In general, how adequate are your blocks?
   1. 0% (completely inadequate all the time)
   2. 10%
   3. 20%
   4. 30%
   5. 40%
   6. 50%
   7. 60%
   8. 70%
   9. 80%
   10. 90%
   11. 100% (completely adequate all the time)
   12. Not applicable, I have not performed a peribulbar block before
3. Have you had any previous complications? How many complications? What kind of complications did you encounter?
4. How confident do you feel from a scale of 1 to 10 (1 being very unconfident, 10 being very confident) in performing a peribulbar block safely and effectively?
5. How competent do you feel from a scale of 1 to 10 (1 being very unconfident, 10 being very confident) in performing a peribulbar block safely and effectively?

**Appendix 2: Questionnaire given to surgical trainers before and after workshop.**

1. Type of peribulbar block given
   1. Infraorbital
   2. Supraorbital
   3. Infraorbital + supraorbital
   4. Other
2. How many peribulbar blocks has the trainee performed so far prior to this grading attempt?
   1. 0
   2. 1-5
   3. 6-10
   4. 11-20
   5. 21-50
   6. 51-100
   7. 101-200
   8. 201-500
   9. 501-1000
   10. >1000
3. After 30 seconds of giving the peribulbar block, globe movement on RIGHT gaze is: (0% is no movement, 100% is full range of movement)
   1. 0% (no movement)
   2. 25%
   3. 50%
   4. 75%
   5. 100% (full range of movement)
4. After 30 seconds of giving the peribulbar block, globe movement on LEFT gaze is: (0% is no movement, 100% is full range of movement)
   1. 0% (no movement)
   2. 25%
   3. 50%
   4. 75%
   5. 100% (full range of movement)
5. After 30 seconds of giving the peribulbar block, globe movement on UP gaze is: (0% is no movement, 100% is full range of movement)
   1. 0% (no movement)
   2. 25%
   3. 50%
   4. 75%
   5. 100% (full range of movement)
6. After 30 seconds of giving the peribulbar block, globe movement on DOWN gaze is: (0% is no movement, 100% is full range of movement)
   1. 0% (no movement)
   2. 25%
   3. 50%
   4. 75%
   5. 100% (full range of movement)
7. How confident do you feel from a scale of 1 to 10 (1 being very unconfident, 10 being very confident) in the trainee performing a peribulbar block safely and effectively?
8. How competent do you feel the trainee is from a scale of 1 to 10 (1 being very unconfident, 10 being very confident) in performing a peribulbar block safely and effectively?
9. Any complications experienced during the peribulbar block or surgery?
